# Supplementary material for: Quantitative Multiparametric Ultrasound (mpUS) in the Assessment of Inconclusive Cervical Lymph Nodes
Source: MDPI journal article supplement (doi:10.3390/cancers14071597), 2022-03-22
Supplement: s1 [file s1]

## Article

# Quantitative Multiparametric Ultrasound (mpUS) in the Assessment of Inconclusive Cervical Lymph Nodes

Markus H. Lerchbaumer, Katharina Margherita Wakonig, Philipp Arens, Steffen Dommerich and Thomas Fischer

## Supplementary Material.

**Table S1.** Contrast-enhanced ultrasound analysis of general cohort. All metric variables are given as median with corresponding standard deviation. Abbreviations: TTP denotes time to peak; mTTI, transit time; PE, peak enhancement; RT, rise time; WiAUC, wash-in area under the curve; WiR, wash-in rate; WiPi, wash-in perfusion index; WoAUC, wash-out area under the curve; WiWoAUC, wash-in/wash-out area under the curve; FT, fall time; WoR, wash-out rate.

| Contrast-Enhanced Ultrasound ( <i>n</i> = 98) |                         |                            |                 |
|-----------------------------------------------|-------------------------|----------------------------|-----------------|
|                                               | Benign ( <i>n</i> = 34) | Malignant ( <i>n</i> = 64) | <i>p</i> -Value |
| <b>Lin</b>                                    | 116445.85 ± 353924.19   | 123339.71 ± 404779.02      | > 0.05          |
| <b>TTP (s)</b>                                | 8.18 ± 2.71             | 8.52 ± 2.59                | > 0.05          |
| <b>mTTI (s)</b>                               | 38.8 ± 28.65            | 52.05 ± 63.13              | > 0.05          |
| <b>PE</b>                                     | 959188.62 ± 3076141.37  | 1132352.14 ± 3974686.15    | > 0.05          |
| <b>RT (s)</b>                                 | 5.37 ± 1.78             | 5.85 ± 2.19                | > 0.05          |
| <b>WiAUC</b>                                  | 2240176.88 ± 6730820.83 | 3063429.61 ± 11173425.6    | > 0.05          |
| <b>WiR</b>                                    | 372230.53 ± 1251089.89  | 372547.11 ± 1265149.67     | > 0.05          |
| <b>WiPi</b>                                   | 601649.24 ± 1929603.57  | 704199.7 ± 2455057.61      | > 0.05          |
| <b>WoAUC</b>                                  | 3862267.84 ± 11482342.4 | 4802503.87 ± 16689799.6    | > 0.05          |
| <b>WiWoAUC</b>                                | 6102444.61 ± 18194135.2 | 7865933.4 ± 27746921.3     | > 0.05          |
| <b>FT (s)</b>                                 | 11.44 ± 4.60            | 14.36 ± 8.6                | > 0.05          |
| <b>WoR</b>                                    | 173184.49 ± 571251.16   | 200415.06 ± 735514.91      | > 0.05          |

**Table S2.** Contrast-enhanced ultrasound analysis of subgroup “Solbiati-Index > 2”. All metric variables are given as median with corresponding standard deviation. Abbreviations: TTP denotes time to peak; mTTI, transit time; PE, peak enhancement; RT, rise time; WiAUC, wash-in area under the curve; WiR, wash-in rate; WiPi, wash-in perfusion index; WoAUC, wash-out area under the curve; WiWoAUC, wash-in/wash-out area under the curve; FT, fall time; WoR, wash-out rate.

| <b>Contrast-Enhanced Ultrasound (<i>n</i> = 25)</b> |                               |                                 |                       |
|-----------------------------------------------------|-------------------------------|---------------------------------|-----------------------|
|                                                     | <b>Benign (<i>n</i> = 16)</b> | <b>Malignant (<i>n</i> = 9)</b> | <b><i>p</i>-Value</b> |
| <b>Lin</b>                                          | 208874.77 ± 491519.34         | 9996.06 ± 29071.5               | > 0.05                |
| <b>TTP (s)</b>                                      | 8.25 ± 2.56                   | 8.93 ± 1.8                      | > 0.05                |
| <b>mTTI (s)</b>                                     | 34.57 ± 26.41                 | 42.72 ± 22.01                   | > 0.05                |
| <b>PE</b>                                           | 1892053.03 ± 4344410.95       | 58919.62 ± 173935.83            | > 0.05                |
| <b>RT (s)</b>                                       | 5.25 ± 1.67                   | 5.88 ± 1.09                     | > 0.05                |
| <b>WiAUC</b>                                        | 4134349.87 ± 9381491.06       | 181138.75 ± 532248.05           | > 0.05                |
| <b>WiR</b>                                          | 755992.07 ± 1771420.95        | 17112.39 ± 50637.85             | > 0.05                |
| <b>WiPi</b>                                         | 1184165.98 ± 2725209.69       | 37265.28 ± 109982.92            | > 0.05                |
| <b>WoAUC</b>                                        | 6811490.10 ± 15740943.3       | 321511.03 ± 941987.11           | > 0.05                |
| <b>WiWoAUC</b>                                      | 10945839.7 ± 25118069.6       | 502649.76 ± 1474234.74          | > 0.05                |
| <b>FT (s)</b>                                       | 10.7 ± 4.35                   | 12.26 ± 2.98                    | > 0.05                |
| <b>WoR</b>                                          | 355004.79 ± 355004.79         | 7148.72 ± 21196.03              | > 0.05                |

**Table S3.** Contrast-enhanced ultrasound analysis of subgroup “Short axis diameter <1cm”. All metric variables are given as median with corresponding standard deviation. Abbreviations: TTP denotes time to peak; mTTI, transit time; PE, peak enhancement; RT, rise time; WiAUC, wash-in area under the curve; WiR, wash-in rate; WiPi, wash-in perfusion index; WoAUC, wash-out area under the curve; WiWoAUC, wash-in/wash-out area under the curve; FT, fall time; WoR, wash-out rate.

| <b>Contrast-Enhanced Ultrasound (<i>n</i> = 45)</b> |                               |                                  |                       |
|-----------------------------------------------------|-------------------------------|----------------------------------|-----------------------|
|                                                     | <b>Benign (<i>n</i> = 27)</b> | <b>Malignant (<i>n</i> = 18)</b> | <b><i>p</i>-Value</b> |
| <b>meanLin</b>                                      | 123840.67 ± 387687.53         | 45911.75 ± 109515.07             | > 0.05                |
| <b>TTP (s)</b>                                      | 8.33 ± 2.82                   | 7.91 ± 2.87                      | > 0.05                |
| <b>mTTI (s)</b>                                     | 42.14 ± 30.4                  | 32.77 ± 24.7                     | > 0.05                |
| <b>PE</b>                                           | 1121399.16 ± 3433057.41       | 467533.02 ± 1212756.07           | > 0.05                |
| <b>RT (s)</b>                                       | 5.51 ± 1.81                   | 5.35 ± 2.33                      | > 0.05                |
| <b>WiAUC</b>                                        | 2450676.39 ± 7420124.02       | 1075655.33 ± 2719378.16          | > 0.05                |
| <b>WiR</b>                                          | 448046.91 ± 1397707.25        | 177994.01 ± 470568.09            | > 0.05                |
| <b>WiPI</b>                                         | 701845.828 ± 2153151.89       | 290738.07 ± 754994.18            | > 0.05                |
| <b>WoAUC</b>                                        | 4037905.9 ± 12432549.6        | 1681654.71 ± 4276539.57          | > 0.05                |
| <b>WiWoAUC</b>                                      | 6488582.14 ± 19849431.8       | 2757310.06 ± 6992273.45          | > 0.05                |
| <b>FT (s)</b>                                       | 11.76 ± 4.54                  | 12.24 ± 6.81                     | > 0.05                |
| <b>WoR</b>                                          | 210390.36 ± 637763.45         | 98219.89 ± 257868.03             | > 0.05                |
